# Supplementary material for: Identification of Retinopathy of Prematurity Related miRNAs in Hyperoxia-Induced Neonatal Rats by Deep Sequencing
Source: MDPI journal article supplement (doi:10.3390/ijms16010840), 2014-12-31
Supplement: s1 [file s1]

# Supplementary Information

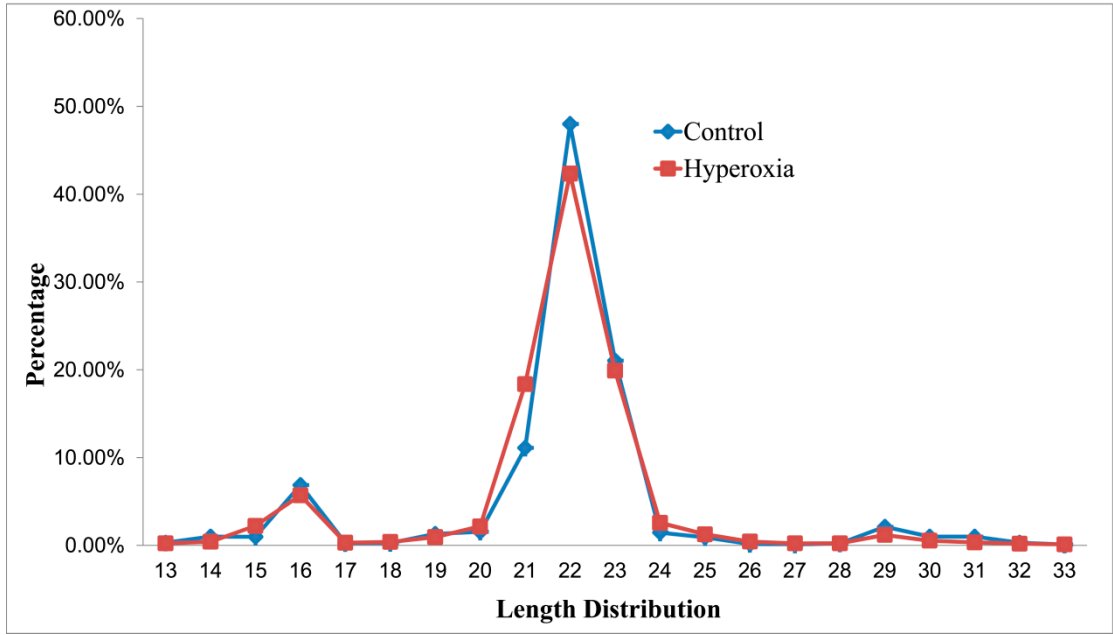

**Figure S1.** Length distribution and abundance of the sRNAs from hyperoxia model rats and normal control samples. sRNA reads with a length of 22 nt were the most abundant, which accounting for about 50% of total reads, then followed by 23 and 21 nt reads.

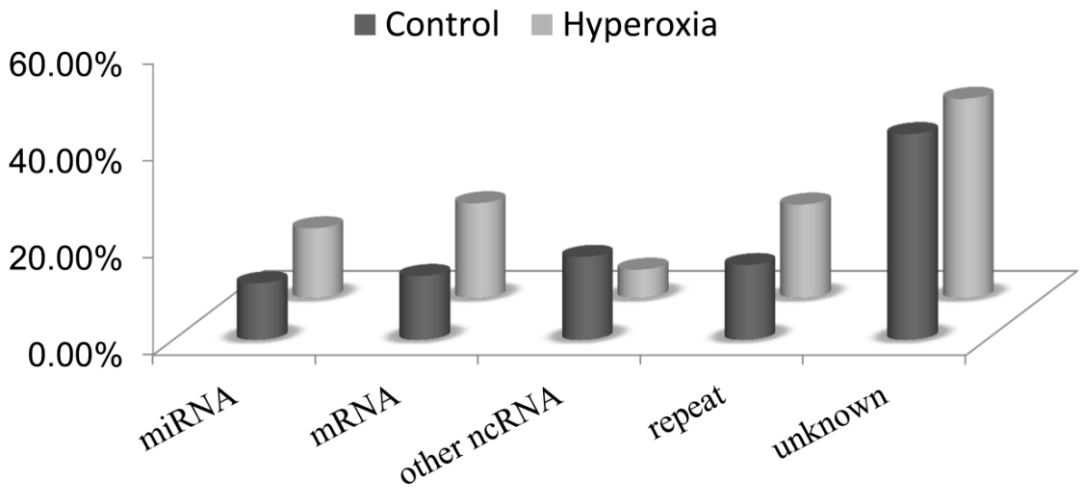

**Figure S2.** Distribution of different small RNA categories in hyperoxia and control libraries. Sequenced sRNAs were annotated and classified as: Other ncRNA, repeats, mRNA and miRNAs, *et al.*

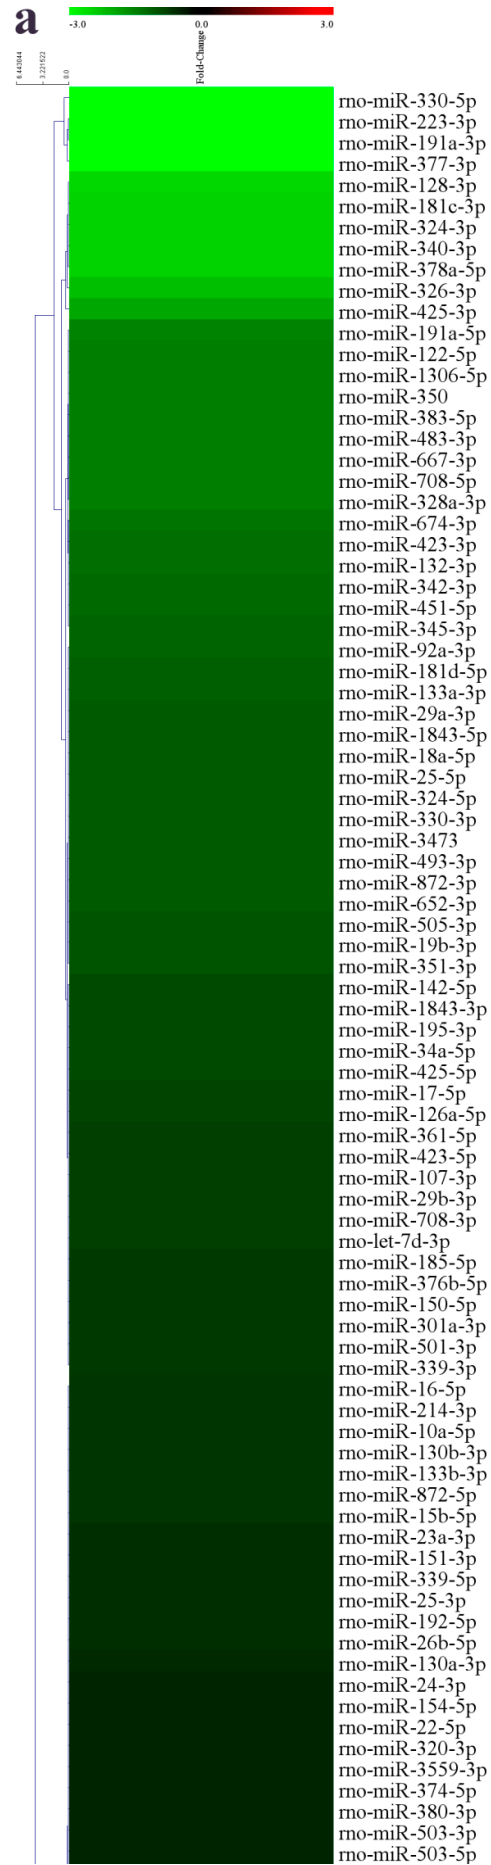

b

mo-miR-7a-5p  
 mo-miR-215  
 mo-miR-322-3p  
 mo-miR-26a-5p  
 mo-miR-148b-3p  
 mo-miR-27a-3p  
 mo-miR-340-5p  
 mo-miR-27b-3p  
 mo-miR-106b-3p  
 mo-miR-210-3p  
 mo-miR-93-5p  
 mo-miR-410-3p  
 mo-miR-3559-5p  
 mo-miR-20a-5p  
 mo-miR-671  
 mo-miR-146b-5p  
 mo-miR-21-5p  
 mo-miR-146a-5p  
 mo-miR-186-5p  
 mo-miR-30b-5p  
 mo-miR-673-5p  
 mo-miR-98-5p  
 mo-miR-484  
 mo-miR-382-5p  
 mo-miR-378a-3p  
 mo-miR-369-3p  
 mo-miR-22-3p  
 mo-miR-184  
 mo-miR-181c-5p  
 mo-let-7i-5p  
 mo-miR-30c-5p  
 mo-miR-19a-3p  
 mo-miR-200b-5p  
 mo-miR-365-3p  
 mo-miR-421-3p  
 mo-miR-485-3p  
 mo-miR-10b-5p  
 mo-miR-144-3p  
 mo-miR-542-5p  
 mo-miR-1839-5p  
 mo-miR-540-3p  
 mo-miR-15b-3p  
 mo-miR-144-5p  
 mo-miR-103-3p  
 mo-miR-203b-3p  
 mo-miR-361-3p  
 mo-miR-409a-3p  
 mo-let-7a-5p  
 mo-miR-30d-5p  
 mo-miR-222-3p  
 mo-miR-93-3p  
 mo-miR-322-5p  
 mo-miR-142-3p  
 mo-miR-335  
 mo-miR-485-5p  
 mo-miR-140-5p  
 mo-miR-101b-3p  
 mo-miR-181b-5p  
 mo-miR-127-5p  
 mo-miR-221-3p  
 mo-miR-450a-5p  
 mo-miR-582-3p  
 mo-miR-874-3p  
 mo-miR-101a-3p  
 mo-miR-206-3p  
 mo-miR-125b-2-3p  
 mo-miR-1-3p  
 mo-miR-134-5p  
 mo-miR-27a-5p  
 mo-miR-378b  
 mo-miR-24-2-5p  
 mo-miR-151-5p  
 mo-miR-483-5p  
 mo-miR-126a-3p  
 mo-miR-30e-3p  
 mo-miR-30a-5p  
 mo-miR-136-3p  
 mo-miR-143-3p  
 mo-miR-30e-5p  
 mo-miR-28-5p  
 mo-let-7f-5p  
 mo-miR-181a-5p  
 mo-let-7a-1-3p  
 mo-let-7c-2-3p  
 mo-miR-31a-5p  
 mo-miR-434-5p  
 mo-miR-499-5p  
 mo-miR-100-5p

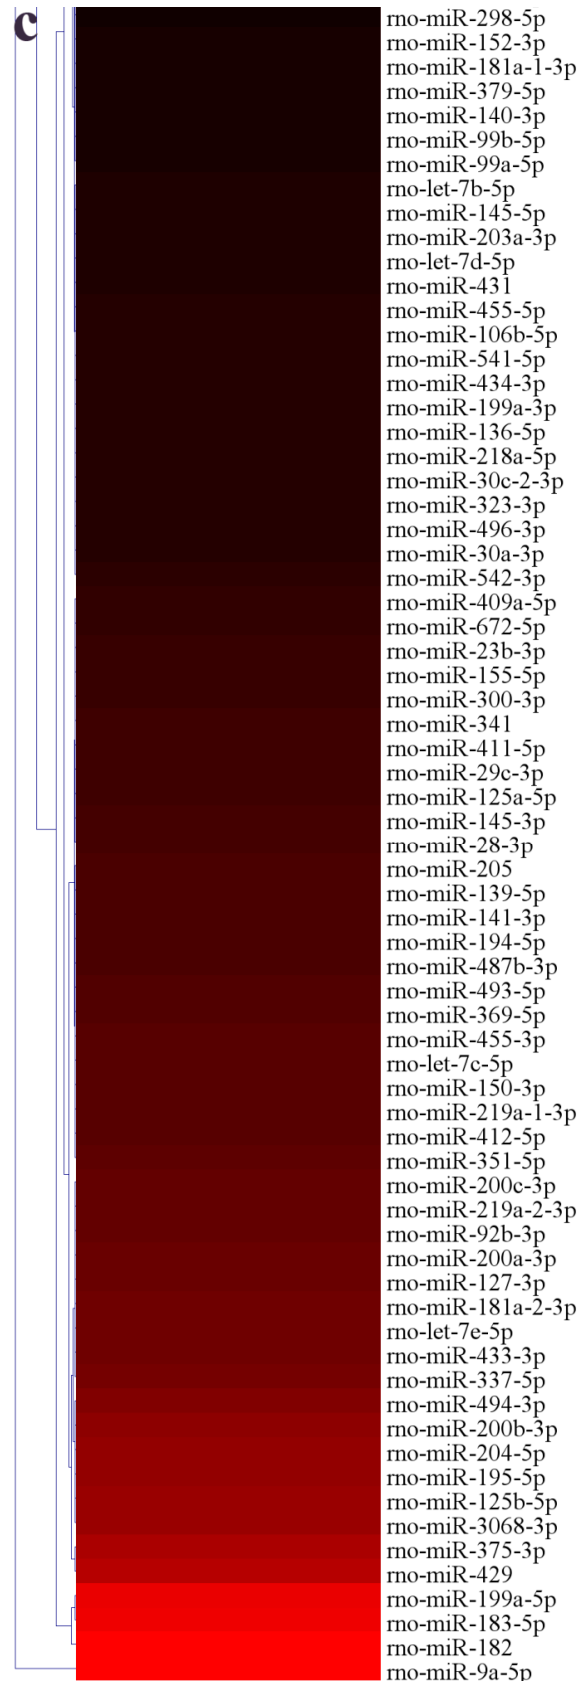

**Figure S3.** Hierarchical clustering analysis of miRNAs expression in hyperoxia model rats compared to the control. The data removed those low copy numbers of miRNAs (<5 copies). The each pattern means the fold change as Log 2 (treatment/control), from high (red) to low (green) (a–c).

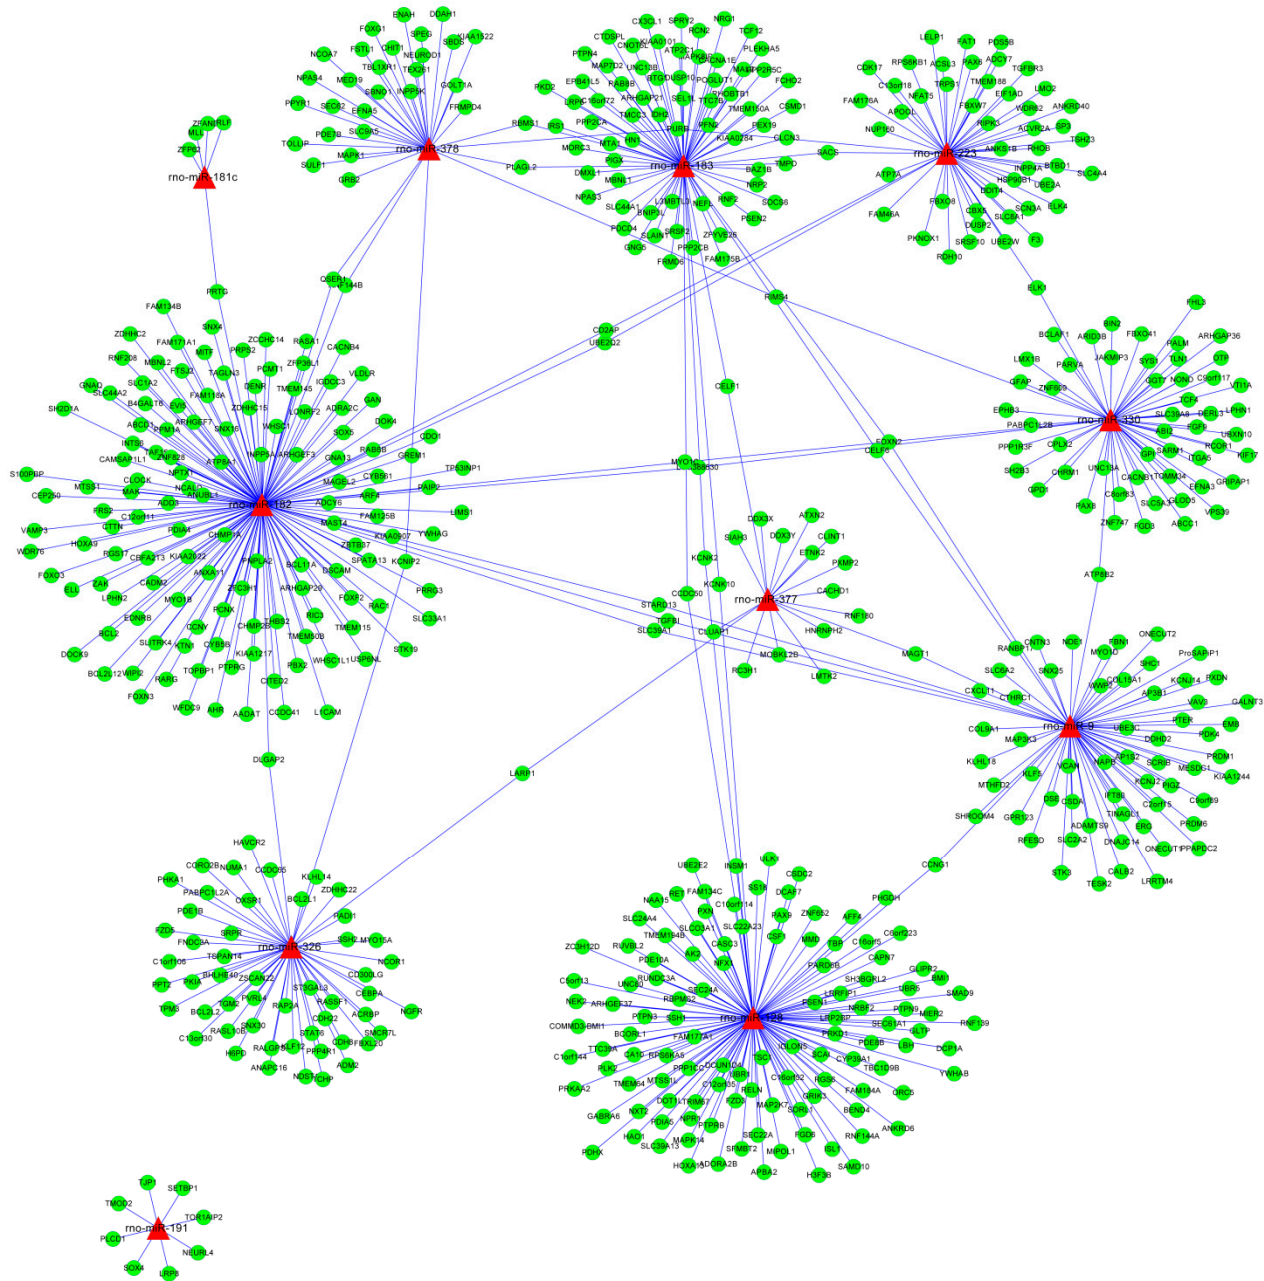

**Figure S4.** miRNA-mediated regulatory network in the hyperoxia model rats. The green nodes represent the miRNAs and the red nodes represent their targets.
